# Supplementary material for: Effects of integrated models of care for diabetes and hypertension in low-income and middle-income countries: a systematic review and meta-analysis
Source: HighWire-hosted journal article supplement (doi:10.1136/bmjopen-2020-043705), 2021-07-01
Supplement: bmjopen-2020-043705supp002_data_supplement.pdf [file bmjopen-2020-043705supp002_data_supplement.pdf]

## Supplementary file 2: List of excluded studies and reasons for exclusion

| Studies excluded for wrong population                                                                                                                                                                                                          | Studies excluded for wrong study design                                                                                                                                                                                                                                                                                                                                                                                                                                                                                                                                            | Studies excluded for wrong intervention                                                                                                                                                                                                                                                                            |
|------------------------------------------------------------------------------------------------------------------------------------------------------------------------------------------------------------------------------------------------|------------------------------------------------------------------------------------------------------------------------------------------------------------------------------------------------------------------------------------------------------------------------------------------------------------------------------------------------------------------------------------------------------------------------------------------------------------------------------------------------------------------------------------------------------------------------------------|--------------------------------------------------------------------------------------------------------------------------------------------------------------------------------------------------------------------------------------------------------------------------------------------------------------------|
| Abrahams-Gessel 2018 <sup>1</sup><br>Adomaviciute 2014 <sup>2</sup><br>Alharbi 2014 <sup>3</sup><br>Miao 2016 <sup>4</sup><br>Myers 2018 <sup>5</sup><br>Rakic 2011 <sup>6</sup><br>Sarrafzadegan 2006 <sup>7</sup><br>Spaak 2017 <sup>8</sup> | Ajay 2016 <sup>9</sup><br>Al Asmary 2013 <sup>10</sup><br>Garrib 2018 <sup>11</sup><br>Germe 2017 <sup>12</sup><br>Kwarisiima 2019 <sup>13</sup><br>Li 2013 <sup>14</sup><br>Mahomed 2014 <sup>15</sup><br>Narayanan 2012 <sup>16</sup><br>Nigatu 2012 <sup>17</sup><br>Nyabera 2011 <sup>18</sup><br>Patel 2018 <sup>19</sup><br>Patel 2015 <sup>20</sup><br>Rabkin 2018 <sup>21</sup><br>Samb 2010 <sup>22</sup><br>Sarraf-Zadegan 2003 <sup>23</sup><br>Sushilkumar 2015 <sup>24</sup><br>Tedjokusumo 2003 <sup>25</sup><br>Tiam 2012 <sup>26</sup><br>Wasay 2009 <sup>27</sup> | Bachmann 2018 <sup>28</sup><br>Hong 2013 <sup>29</sup><br>Kowalski 2017 <sup>30</sup><br>McKee 2011 <sup>31</sup><br>Mendis 2010 <sup>32</sup><br>Pibernik-Okanovic 2015 <sup>33</sup><br>Saleh 2018 <sup>34</sup><br>Sarrafzadegan 2009 <sup>35</sup><br>Tourkmani 2018 <sup>36</sup><br>Wenxi 2017 <sup>37</sup> |

1. Abrahams-Gessel S, Beratarrechea A, Irazola V, et al. Using mHealth tools to improve access, coverage and treatment of uninsured people with high cardiovascular disease risk in Argentina: a study protocol for a pragmatic cluster randomised trial. *BMJ innovations* 2018;4(3):135-41. doi: 10.1136/bmjinnov-2017-000255
2. Adomaviciute S, Watt H, Soljak M, et al. Impact of the Integrated Care Pilot on HbA1c, cholesterol and systolic blood pressure levels in patients with diabetes. *Diabetic Medicine* 2014;31(SUPPL. 1):175. doi: <http://dx.doi.org/10.1111/dme.12378> 2
3. Alharbi TJ, Tourkmani A, Alkhashan H, et al. Impact of integrated care program on glycemic control and cardiovascular risk in patients with type 2 diabetes; Interventional controlled study. *Diabetes Research and Clinical Practice* 2014;106(SUPPL. 1):S93-S94.
4. Miao Y, Zhang L, Sparring V, et al. Improving health related quality of life among rural hypertensive patients through the integrative strategy of health services delivery: A quasi-experimental trial from Chongqing, China. *International Journal for Equity in Health* 2016;15(1):132. doi: <http://dx.doi.org/10.1186/s12939-016-0421-x>
5. Myers B, Lund C, Lombard C, et al. Comparing dedicated and designated models of integrating mental health into chronic disease care: study protocol for a cluster randomized controlled trial. *Trials* 2018;19(1) (no pagination) doi: 10.1186/s13063-018-2568-9
6. Rakic D, Jakovljevic D. [Integrated approach to prevention and control of cardiovascular diseases]. *Srpski arhiv za celokupno lekarstvo* 2011;139(5-6):304-10.
7. Sarrafzadegan N, Baghaei A, Sadri G, et al. Isfahan healthy heart program: Evaluation of comprehensive, community-based interventions for non-communicable disease prevention. *Prevention and Control* 2006;2(2):73-84. doi: <http://dx.doi.org/10.1016/j.precon.2006.10.003>

8. Spaak J, Brommels M, Kahan T, et al. Integrated, Multidisciplinary, Person-centered Care for Patients With Complex Comorbidities: Heart, Kidney and Diabetes, 2017.
9. Ajay VS, Jindal D, Roy A, et al. Development of a Smartphone-Enabled Hypertension and Diabetes Mellitus Management Package to Facilitate Evidence-Based Care Delivery in Primary Healthcare Facilities in India: The mPower Heart Project. *Journal of the American Heart Association* 2016;5(12) doi: 10.1161/jaha.116.004343
10. Al Asmary SM, Al-Harbi T, Tourkmani AM, et al. Impact of integrated care program on glycemic control and cardiovascular risk in adult patients with type 2 diabetes. *Journal of Clinical Outcomes Management* 2013;20(8):356-63.
11. Garrib A, Birungi J, Lesikari S, et al. Integrated care for human immunodeficiency virus, diabetes and hypertension in Africa. *Transactions of the Royal Society of Tropical Medicine and Hygiene* 2018 doi: 10.1093/trstmh/try098
12. Germe M, Zingwari J, Matji R, et al. Baseline assessment of high volume facility capacity to provide integrated tuberculosis (TB) and diabetes (DM) services in South Africa. *Diabetes* 2017;66(Supplement 1):A460-A61.
13. Kwarisiima D, Atukunda M, Owaraganise A, et al. Hypertension control in integrated HIV and chronic disease clinics in Uganda in the SEARCH study. *BMC Public Health* 2019;19(1):511. doi: 10.1186/s12889-019-6838-6 [published Online First: 2019/05/08]
14. Li Q, Li L, Fan XL, et al. The values of evidence-based comprehensive care for patients with type 2 diabetes mellitus and cardiovascular diseases to improve the quality of life. *Heart* 2013;99(SUPPL. 3):A282-A83. doi: <http://dx.doi.org/10.1136/heartjnl-2013-304613.797>
15. Mahomed OH, Asmall S, Freeman M. An integrated chronic disease management model: a diagonal approach to health system strengthening in South Africa. *Journal of health care for the poor and underserved* 2014;25(4):1723-29. doi: <http://dx.doi.org/10.1353/hpu.2014.0176>
16. Narayanan G, Prabhakaran D. Integrating mental health into cardiovascular disease research in India. *National Medical Journal of India* 2012;25(5):274-80.
17. Nigatu T. Integration of HIV and noncommunicable diseases in health care delivery in low- and middle-income countries. *Preventing chronic disease* 2012;9:E93.
18. Nyabera RA, Yonga G, Mwangemi F, et al. Evaluation of a project integrating cardiovascular care into HIV programmes. *Cardiovascular Journal of Africa* 2011;22(3 SUPPL. 1):S17.
19. Patel P, Speight C, Maida A, et al. Integrating HIV and hypertension management in low-resource settings: Lessons from Malawi. *PLoS medicine* 2018;15(3):e1002523. doi: 10.1371/journal.pmed.1002523
20. Patel V, Chatterji S. Integrating Mental Health In Care For Noncommunicable Diseases: An Imperative For Person-Centered Care. *Health affairs (Project Hope)* 2015;34(9):1498-505. doi: 10.1377/hlthaff.2015.0791
21. Rabkin M, Palma A, McNairy ML, et al. Integrating cardiovascular disease risk factor screening into HIV services in Swaziland: lessons from an implementation science study. *Aids* 2018;32:S43-S46. doi: 10.1097/qad.0000000000001889
22. Samb B, Desai N, Nishtar S, et al. Chronic Diseases: Chronic Diseases and Development 4 Prevention and management of chronic disease: a litmus test for health-systems strengthening in low-income and middle-income countries. *Lancet* 2010;376(9754):1785-97. doi: 10.1016/s0140-6736(10)61353-0
23. Sarraf-Zadegan N, Sadri G, Malek Afzali H, et al. Isfahan Healthy Heart Programme: a comprehensive integrated community-based programme for cardiovascular disease prevention and control. Design, methods and initial experience. *Acta cardiologica* 2003;58(4):309-20. doi: 10.2143/ac.58.4.2005288
24. Sushilkumar PL, Mahendrakumar BJ, Suman B, et al. Implementation and evaluation of health screening services to diabetic and hypertensive patients in a selected community pharmacy at belgaum city. *Asian Journal of Pharmaceutical and Clinical Research* 2015;8(3):305-15.
25. Tedjokusumo R. Introducing the integrated cardiovascular services at Dr. Hasan Sadikini Hospital. *Heart Lung and Circulation* 2003;12(SUPPL. 2):S82-384. doi: <http://dx.doi.org/10.1046/j.1443-9506.2003.t01-4-.x>

26. Tiam A, Oyebanji O, Nkonyana J, et al. Family health days: An innovative approach to providing integrated health services for HIV and non-communicable diseases among adults and children in hard-to-reach areas of Lesotho. *Journal of the International AIDS Society* 2012;15(SUPPL. 3):236. doi: <http://dx.doi.org/org/10.7448/IAS.15.5.18438>
27. Wasay M, Jabbar A. Fight against chronic diseases (high blood pressure, stroke, diabetes and cancer) in Pakistan; cost-effective interventions. *JPMA The Journal of the Pakistan Medical Association* 2009;59(4):196-7.
28. Bachmann MO, Bateman ED, Stelmach R, et al. Integrating primary care of chronic respiratory disease, cardiovascular disease and diabetes in Brazil: Practical Approach to Care Kit (PACK Brazil): study protocol for randomised controlled trials. *Journal of Thoracic Disease* 2018;10(7):4667-77.
29. Hong T. Web-Based Collaborative Care for Patients With Diabetes and Depression. <https://clinicaltrials.gov/show/nct01985711> 2013
30. Kowalski AJ, Poongothai S, Chwastiak L, et al. The INtegrating DEPrEssioN and Diabetes treatmENT (INDEPENDENT) study: Design and methods to address mental healthcare gaps in India. *Contemporary clinical trials* 2017;60:113-24. doi: 10.1016/j.cct.2017.06.013
31. McKee MD, Fletcher J, Sigal I, et al. A collaborative approach to control hypertension in diabetes: outcomes of a pilot intervention. *Journal of primary care & community health* 2011;2(3):148-52. doi: 10.1177/2150131911401028
32. Mendis S, Johnston SC, Fan W, et al. Cardiovascular risk management and its impact on hypertension control in primary care in low-resource settings: a cluster-randomized trial. *Bulletin of the World Health Organization* 2010;88(6):412-9. doi: 10.2471/blt.08.062364
33. Pibernik-Okanovic M, Hermanns N, Ajdukovic D, et al. Does treatment of subsyndromal depression improve depression-related and diabetes-related outcomes? A randomised controlled comparison of psychoeducation, physical exercise and enhanced treatment as usual. *Trials* 2015;16:305. doi: 10.1186/s13063-015-0833-8
34. Saleh S, Farah A, Dimassi H, et al. Using Mobile Health to Enhance Outcomes of Noncommunicable Diseases Care in Rural Settings and Refugee Camps: Randomized Controlled Trial. *JMIR mHealth and uHealth* 2018;6(7):e137. doi: 10.2196/mhealth.8146
35. Sarrafzadegan N, Kelishadi R, Esmailzadeh A, et al. Do lifestyle interventions work in developing countries? Findings from the Isfahan Healthy Heart Program in the Islamic Republic of Iran. *Bull World Health Organ* 2009;87(1):39-50. doi: 10.2471/blt.07.049841
36. Tourkmani AM, Abdelhay O, Alkhashan HI, et al. Impact of an integrated care program on glycemic control and cardiovascular risk factors in patients with type 2 diabetes in Saudi Arabia: an interventional parallel-group controlled study. *BMC Fam Pract* 2018;19:10. doi: 10.1186/s12875-017-0677-2
37. Wenxi T, Yan Z, Liang Z. Effects of provider incentives in integrated healthcare delivery system reform: a quasiexperiment on patients with chronic diseases in rural China. *International Journal of Integrated Care (IJIC)* 2017;17(3):171-72. doi: 10.5334/ijic.3207
