# Supplementary material for: Effects of integrated models of care for diabetes and hypertension in low-income and middle-income countries: a systematic review and meta-analysis
Source: HighWire-hosted journal article supplement (doi:10.1136/bmjopen-2020-043705), 2021-07-01
Supplement: bmjopen-2020-043705supp003_data_supplement.pdf [file bmjopen-2020-043705supp003_data_supplement.pdf]

## Supplementary file 3: Summary of interventions according to the TIDiER checklist: Integrated models of care

| Study ID                                                             | Ameh 2017                                                                                                                           |                                                           | Rawat 2018*                                                                                                                 | Havliir 2019                                                                                                                                                                            |                                                                                                                                                          |
|----------------------------------------------------------------------|-------------------------------------------------------------------------------------------------------------------------------------|-----------------------------------------------------------|-----------------------------------------------------------------------------------------------------------------------------|-----------------------------------------------------------------------------------------------------------------------------------------------------------------------------------------|----------------------------------------------------------------------------------------------------------------------------------------------------------|
| Intervention groups                                                  | Intervention                                                                                                                        | Control                                                   | Intervention                                                                                                                | Intervention                                                                                                                                                                            | Control                                                                                                                                                  |
| <b>Name of intervention</b>                                          | Integrated chronic disease management (ICDM) model                                                                                  | Standard care in clinics where ICDM model was not piloted | Implementation of national policy to integrate HIV care into all PHC facilities                                             | Integrated care: Baseline HIV and multi-disease testing plus annual testing, universal ART and patient-centered care                                                                    | Usual care: Baseline HIV and multi-disease testing and national guideline-restricted ART, hypertension and diabetes care as per country standard of care |
| <b>Aim of the intervention</b>                                       | To improve management of patients with HIV, TB, hypertension, diabetes, COPD, asthma, epilepsy and mental health conditions at PHCs | Not reported                                              | To provide comprehensive HIV care (prevention, diagnosis, treatment initiation and follow-up) at PHC facilities             | To remove patient-level barriers and maximise the efficiency of the health system<br><br>To overcome barriers of universal access to HIV treatment and to be able to reach UNAIDS goals | Not reported                                                                                                                                             |
| <b>Physical and informational materials used</b>                     | Not reported                                                                                                                        | Not reported                                              | Not reported                                                                                                                | Treatment guidelines<br><br>ART tablets<br><br>SMS reminders                                                                                                                            | National treatment guidelines                                                                                                                            |
| <b>Procedures, activities and processes used in the intervention</b> | Facility reorganisation: designated chronic care area; supply of critical medicines; pre-packaging of medication                    | Not reported                                              | Policy to integrate HIV care into PHC clinics<br><br>Training of nurses in comprehensive management of HIV: Nurse initiated | Community health campaigns (CHCs): Multi-disease testing for HIV, diabetes and hypertension; counselling and clinic appointments for participants with                                  | Community health campaigns: Multi-disease testing for HIV, diabetes and hypertension; counselling and clinic appointments for participants with positive |

|  |                                                                                                                                                                                                                                                                                                               |  |                                                                                                                                                                                                    |                                                                                                                                                                                                                                                                                                                                                                                                                                                                                                                                                                                                                                                                                                                                  |                                                                                                                                                                                                                                                                         |
|--|---------------------------------------------------------------------------------------------------------------------------------------------------------------------------------------------------------------------------------------------------------------------------------------------------------------|--|----------------------------------------------------------------------------------------------------------------------------------------------------------------------------------------------------|----------------------------------------------------------------------------------------------------------------------------------------------------------------------------------------------------------------------------------------------------------------------------------------------------------------------------------------------------------------------------------------------------------------------------------------------------------------------------------------------------------------------------------------------------------------------------------------------------------------------------------------------------------------------------------------------------------------------------------|-------------------------------------------------------------------------------------------------------------------------------------------------------------------------------------------------------------------------------------------------------------------------|
|  | <p>Clinical management support: use of guidelines to manage chronic diseases (PC101); human resources audit; capacity building; appropriate referral</p> <p>Ward-based outreach teams to ensure individual responsibility and “assisted” self-management</p> <p>Health promotion and population screening</p> |  | <p>Management of ART (NIMART)</p> <p>Training of nurses through the Practical Approach to Lung Health in South Africa (PALSA PLUS)</p> <p>Additional staff to strengthen drug delivery systems</p> | <p>positive tests; HIV positive participants received blood tests (CD4, t-cell count, HIV/RNA levels) and one-time round trip transportation voucher for first clinic visit</p> <p>Home-based testing for participants that did not attend CHCs</p> <p>Linkage to ART: HIV positive participants not on ART received appointments to initiate ART within a maximum of 7 days; clinic staff introduced themselves in person or by mobile phone; participants could contact hotline via phone or text message for questions or support; phone/SMS reminders about clinic visits</p> <p>Patient-centered care for HIV, diabetes, hypertension: 3-month visit intervals; flexible clinic hours; reduced waiting time at clinics;</p> | <p>tests; HIV positive participants received blood tests (CD4, t-cell count, HIV/RNA levels) and one-time round trip transportation voucher for first clinic visit</p> <p>ART, diabetes and hypertension treatment: provided in accordance with national guidelines</p> |
|--|---------------------------------------------------------------------------------------------------------------------------------------------------------------------------------------------------------------------------------------------------------------------------------------------------------------|--|----------------------------------------------------------------------------------------------------------------------------------------------------------------------------------------------------|----------------------------------------------------------------------------------------------------------------------------------------------------------------------------------------------------------------------------------------------------------------------------------------------------------------------------------------------------------------------------------------------------------------------------------------------------------------------------------------------------------------------------------------------------------------------------------------------------------------------------------------------------------------------------------------------------------------------------------|-------------------------------------------------------------------------------------------------------------------------------------------------------------------------------------------------------------------------------------------------------------------------|

|                                      |              |              |                                                                                                                                                                                                                                 |                                                                                                                                                                                                             |                                                                                                                                                                                                                              |
|--------------------------------------|--------------|--------------|---------------------------------------------------------------------------------------------------------------------------------------------------------------------------------------------------------------------------------|-------------------------------------------------------------------------------------------------------------------------------------------------------------------------------------------------------------|------------------------------------------------------------------------------------------------------------------------------------------------------------------------------------------------------------------------------|
|                                      |              |              |                                                                                                                                                                                                                                 | welcoming staff; ART to all HIV positive participants; if not eligible for ART according to national guidelines, trial provided Truvada; hypertension and diabetes treated according to standard algorithms |                                                                                                                                                                                                                              |
| <b>Who provided the intervention</b> | Nurses       | Nurses       | Nurses                                                                                                                                                                                                                          | CHCs: Study team in collaboration with the local health units and the Ministry of Health in Uganda and Kenya<br><br>Patient-centered care: government clinics augmented by trial staff                      | CHCs: Study team in collaboration with the local health units and the Ministry of Health in Uganda and Kenya<br><br>Care in clinics: Clinic staff, augmented by additional staff funded by trial to mitigate staff shortages |
| <b>Modes of delivery</b>             | Not reported | Not reported | Practical implementation of policy varied across clinics: Either disease-specific nurses in separate consulting rooms (co-location), or one nurse that provided comprehensive care for all diseases in single consultation room | Face-to-face, via telephone or text message                                                                                                                                                                 | Face-to-face                                                                                                                                                                                                                 |

|                                                         |                                                                                                                                                                                                         |                               |                                                                                                        |                                                                                                                                                  |                                                                                                                                                                                                                             |
|---------------------------------------------------------|---------------------------------------------------------------------------------------------------------------------------------------------------------------------------------------------------------|-------------------------------|--------------------------------------------------------------------------------------------------------|--------------------------------------------------------------------------------------------------------------------------------------------------|-----------------------------------------------------------------------------------------------------------------------------------------------------------------------------------------------------------------------------|
| <b>Location of the intervention</b>                     | Primary healthcare facilities                                                                                                                                                                           | Primary healthcare facilities | Primary healthcare clinics:<br>37 urban clinics<br>65 rural clinics<br>30 clinics from former homeland | CHCs: Under large tents in all communities, or home-based<br><br>Patient-centered care: At clinics                                               | CHC: Under large tents in all communities, or home-based<br>ART, diabetes, hypertension care: At clinics                                                                                                                    |
| <b>When and how much the intervention was delivered</b> | Unstable HIV and hypertension patients: follow-up every month<br><br>Stable HIV and hypertension patients: follow-up every 2-3 months<br><br>Routine referral of all patients to doctor: Every 6 months | Not reported                  | Not reported                                                                                           | CHCs: lasted 2 weeks at baseline, annually and at 3 year endpoint during weekdays, evenings and weekends<br><br>Clinic visits: 3-month intervals | CHCs: lasted 2 weeks at baseline and at 3 year endpoint during weekdays, evenings and weekends<br><br>Clinic visits: not reported                                                                                           |
| <b>Tailoring of the intervention</b>                    | Not reported                                                                                                                                                                                            | Not reported                  | Modular structures and pharmacy renovations to address space concerns in some clinics                  | Not reported                                                                                                                                     | Not reported                                                                                                                                                                                                                |
| <b>Modifications of the intervention</b>                | Not reported                                                                                                                                                                                            | Not reported                  | Not reported                                                                                           | The end point of the trial was reduced from 5 years to 3 years                                                                                   | Control clinics implemented ART guidelines that were specific to Uganda and Kenya; during the trial, the threshold for eligibility for ART in these countries expanded from a specific CD4+ T-cell count (ranging from <350 |

|                                                      |              |              |              |              |                                                                   |
|------------------------------------------------------|--------------|--------------|--------------|--------------|-------------------------------------------------------------------|
|                                                      |              |              |              |              | to <500) to universal treatment (regardless of CD4+ T-cell count) |
| <b>Assessment of intervention adherence/fidelity</b> | Not reported                                                      |
| <b>Intervention delivered as planned</b>             | Not reported                                                      |

\*No control intervention described

HIV human immunodeficiency virus, TB tuberculosis, COPD chronic obstructive pulmonary disease, PHC primary healthcare clinics
